# Supplementary material for: A novel electrochemiluminescent sensor based on AgMOF@N-CD composites for sensitive detection of trilobatin
Source: Royal Society of Chemistry journal article supplement (doi:10.1039/d4an01102c), 2024-01-01
Supplement: d4an01102c1.pdf [file d4an01102c1.pdf]

## **A novel electrochemiluminescence sensor based on AgMOF@N-CDs composites for sensitive detection of trilobatin**

Longmei Yao<sup>a</sup>, Xue Mei<sup>a</sup>, Jiajia Zhi<sup>a</sup>, Wenchang Wang<sup>a,b,\*</sup>, Qingyi Li<sup>c</sup>, Ding Jiang<sup>a</sup>,  
Xiaohui Chen<sup>d</sup>, Zhidong Chen<sup>a,\*</sup>

<sup>a</sup> Jiangsu Key Laboratory of Advanced Catalytic Materials and Technology, School of Petrochemical Engineering, Changzhou University, Changzhou, 213164, China.

<sup>b</sup> Analysis and Testing Center, NERC Biomass of Changzhou University, Jiangsu, 213032, China.

<sup>c</sup> Changzhou High-Tech Industry Development Zone Sanwei Industrial Technology Research Instit Co., Ltd, Changzhou, 213164, China.

<sup>d</sup> School of Chemistry and Material Engineering, Changzhou Institute of Technology, Changzhou 213032, China.

\* Corresponding author.

E-mail address: king717@cczu.edu.cn;

zdchen@cczu.edu.cn

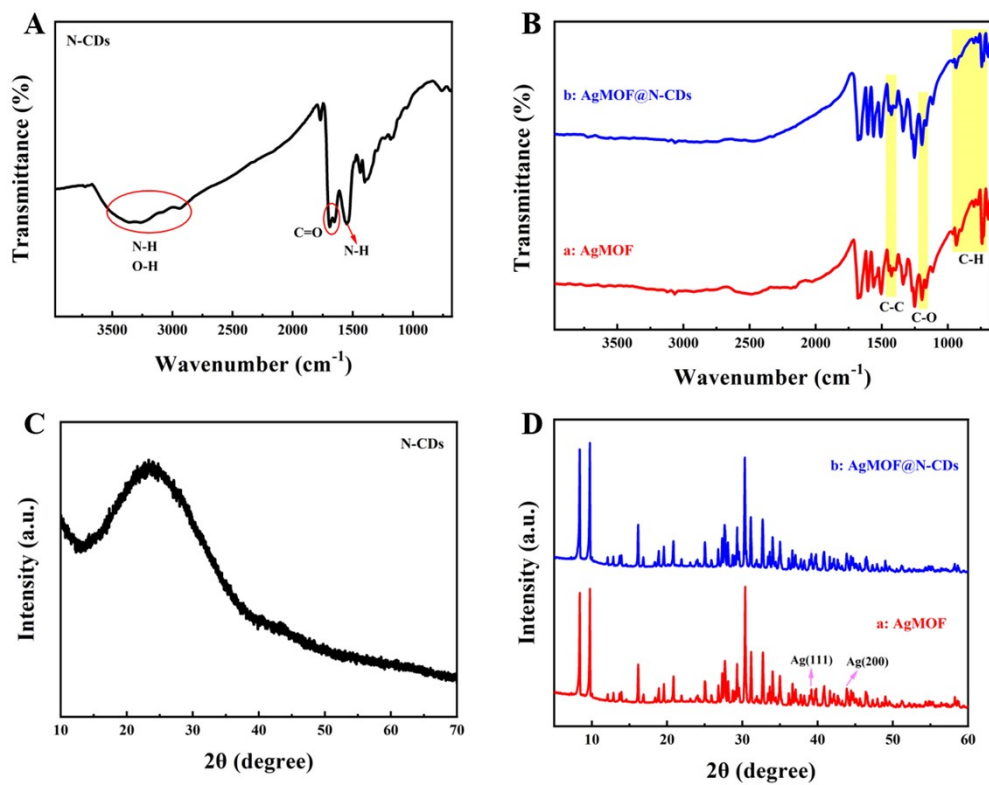

**Fig. S1** (A) FT-IR spectra of N-CDs; (B) FT-IR spectra of AgMOF and AgMOF@N-CDs; (C) XRD spectra of N-CDs; (D) XRD spectra of AgMOF and AgMOF@N-CDs

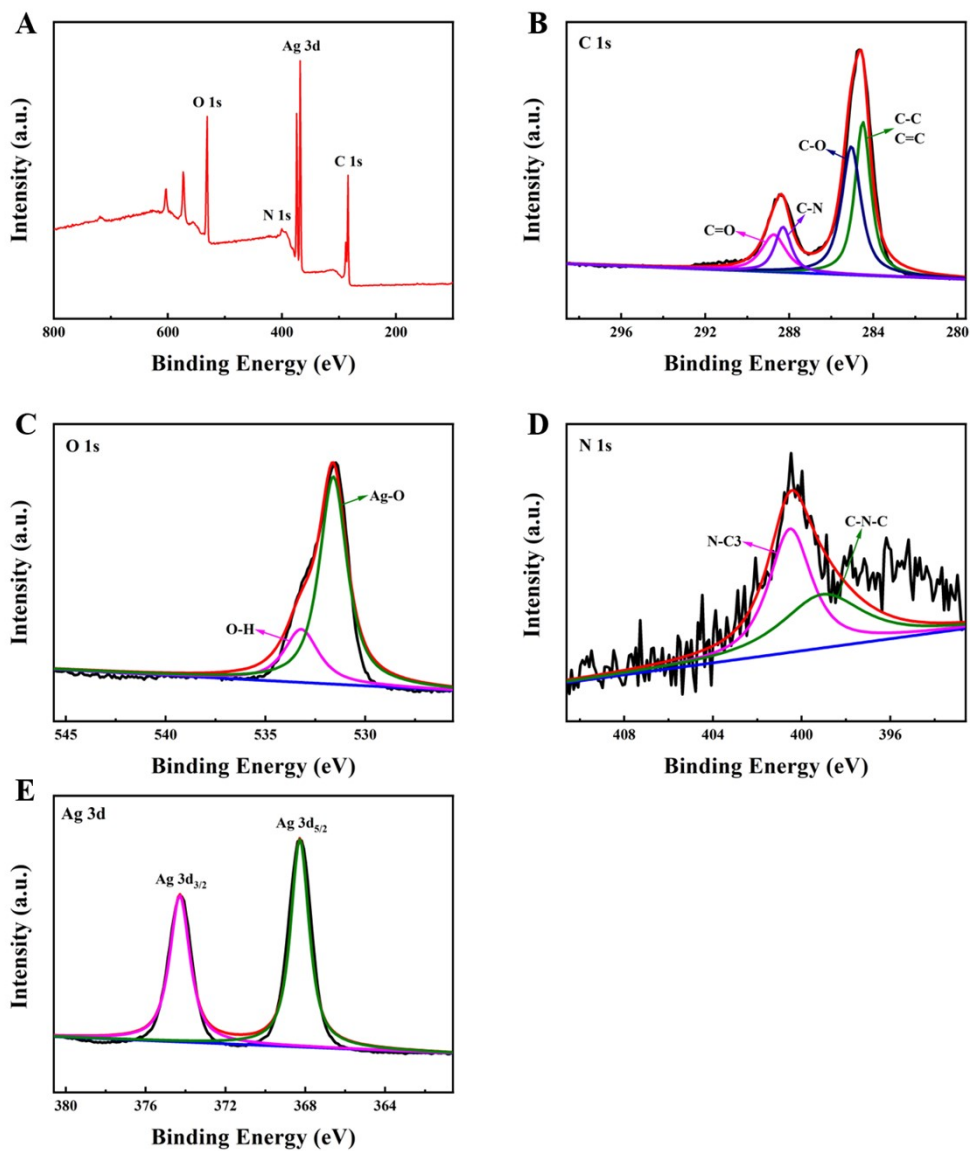

**Fig. S2** (A) Full spectrum of AgMOF@N-CDs; (B) C 1s high-resolution spectrum; (C) O 1s high-resolution spectrum; (D) N 1s high-resolution spectrum; (E) Ag 3d high-resolution spectrum

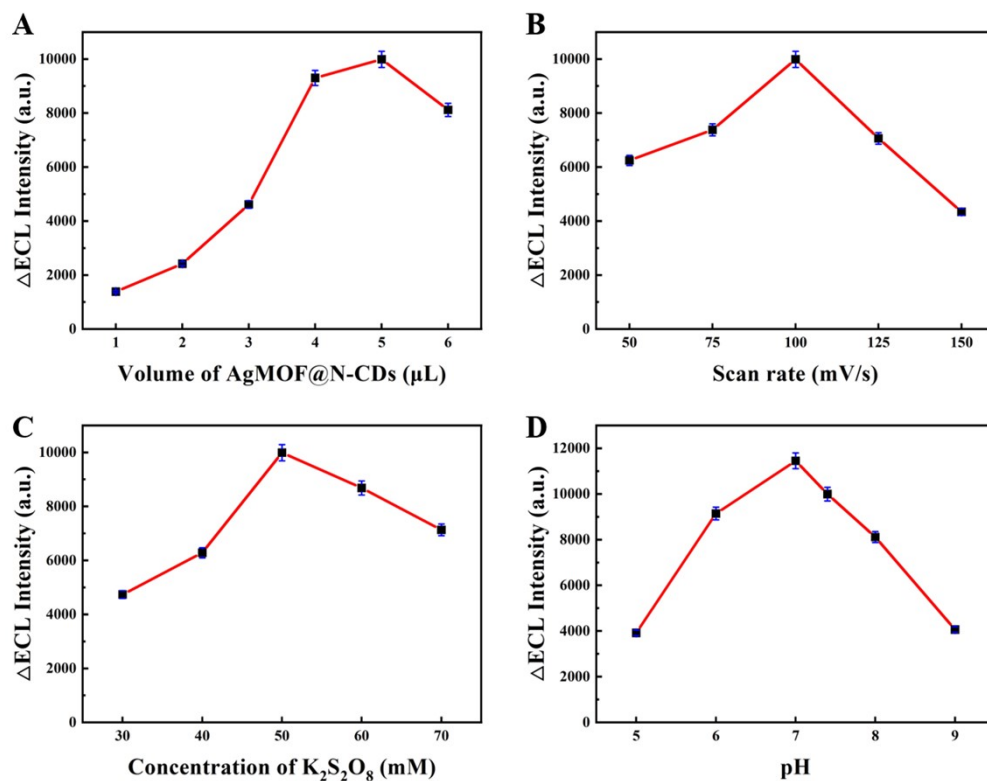

**Fig. S3** Effect of modification volume of AgMOF@N-CDs (A); scan rate (B); concentration of  $K_2S_2O_8$  (C); and pH value of PBS solution (D) on the performance of AgMOF@N-CDs/GCE sensor

**Table S1** Comparison of different methods for determining trilobatin.

| Methods | Linear range                                                     | LOD                             | Ref.      |
|---------|------------------------------------------------------------------|---------------------------------|-----------|
| UV      | $3.7 \times 10^{-6} \text{ M} \sim 9.2 \times 10^{-5} \text{ M}$ | --                              | 1         |
| HPLC    | $2.0 \times 10^{-5} \text{ M} \sim 5.1 \times 10^{-3} \text{ M}$ | $1.15 \times 10^{-7} \text{ M}$ | 2         |
| DPV     | $5.0 \times 10^{-6} \text{ M} \sim 1.0 \times 10^{-3} \text{ M}$ | $2.55 \times 10^{-6} \text{ M}$ | 3         |
| ECL     | $1.0 \times 10^{-7} \text{ M} \sim 1.0 \times 10^{-3} \text{ M}$ | $5.99 \times 10^{-8} \text{ M}$ | This work |

## References

1. H. Q. Dong, Z. X. Ning, L. J. Yu, L. Li, L. C. Lin and J. B. Huang, Preparative separation and identification of the flavonoid phlorhizin from the crude extract of *Lithocarpus polystachyus* Rehd, *Molecules*, 2007, **12**, 552-562.
2. M. Wei, Y. L. Tuo, Y. Zhang, Q. Deng, C. Y. Shi, X. X. Chen and X. Zhang, Evaluation of Two Parts of *Lithocarpus polystachyus* Rehd. from Different Chinese Areas by Multicomponent Content Determination and Pattern Recognition, *J. Anal. Methods Chem.*, 2020, **2020**, 8837526.
3. X. Mei, W. C. Wang, Q. Y. Li, M. X. Wu, L. Y. Bu and Z. D. Chen, A novel electrochemical sensor based on gold nanobipyramids and poly-L-cysteine for the sensitive determination of trilobatin, *Analyst*, 2023, **148**, 2335-2342.
